# Supplementary material
Source: PubMed Central journal article supplement (PMC3538502)
Supplement: jo302053v_si_001.pdf [file jo302053v_si_001.pdf]

# Supporting Information

## Synthesis of Cyclic Py-Im Polyamide Libraries

*Benjamin C. Li, David C. Montgomery, James W. Puckett, and Peter B. Dervan\**

Division of Chemistry and Chemical Engineering,  
California Institute of Technology, Pasadena, CA 91125

### Table of Contents for Supporting Information

|                                                                     | <u>Page</u> |
|---------------------------------------------------------------------|-------------|
| Synthetic Procedure for Hairpin Polyamide <b>17</b>                 | S2          |
| Synthetic Scheme for Hairpin Polyamide <b>17</b>                    | S3          |
| HPLC Spectrometry Data for Cyclic Polyamides <b>1-8, 17-26</b>      | S4-S12      |
| HPLC Spectrometry Data for Cyclic Polyamides Conjugates <b>9-14</b> | S13-S15     |
| HPLC Spectrometry Data for Control Hairpin Polyamides <b>15-16</b>  | S16         |
| Confocal Microscopy Analysis of <b>12-14</b>                        | S17-18      |
| Cytotoxicity of Cbz-functionalized Hairpin Polyamide <b>S1</b>      | S19         |

### Synthesis of hairpin polyamide 17:

Fmoc-Py-Im-(2-Cl-Trt) resin, obtained via the same procedure as for **8**, was subjected to the previously described microwave-assisted solid-phase synthesis conditions to build the corresponding polyamide sequence with an N-terminal PyImOH cap. The resin (70 mg, 0.039 mmol) was then suspended in 2 mL 30% HFIP in DCM, stirred for 1 h, filtered, washed, and concentrated to afford the crude C-terminal free acid. The residue was then dissolved in DMF (1.8 mL) and added dropwise to a pre-activated solution of 3,3'-diamino-N-methyldipropylamine (252  $\mu\text{L}$ , 1.56 mmol, 40 eq.) and PyBOP (40 mg, 0.078 mmol, 2 eq.) in DMF (6.0 mL). After stirring for 1 h and confirmation of complete conjugation by HPLC, the crude product was isolated by Et<sub>2</sub>O precipitation, air dried, redissolved in 8 mL 15% AcN : 0.1% aqueous TFA, and purified by reverse-phase HPLC to yield polyamide intermediate **26** as an off-white powder (11.8  $\mu\text{mol}$ , 30% yield).

The isolated **26** (3.1  $\mu\text{mol}$ ) was dissolved in DMF (200  $\mu\text{L}$ ) and added dropwise to a pre-activated solution of isophthalic acid (12 mg, 0.072 mmol) and PyBOP (5 mg, 9  $\mu\text{mol}$ ) in DMF (800  $\mu\text{L}$ ) and DIEA (13  $\mu\text{L}$ ). After stirring for 1 h and confirmation of complete conjugation by HPLC, the reaction mixture was then precipitated in Et<sub>2</sub>O, isolated by centrifugation, and air dried. The remaining residue was then subjected to 500  $\mu\text{L}$  neat TFA, stirred for 15 min, frozen in LN<sub>2</sub>, thawed by addition of 1 mL DMF, diluted with 6 mL 0.1% aqueous TFA, and purified by reverse-phase HPLC to afford cyclic polyamide **8** (3.1 nmol, 86% yield).

[Note: Extinction coefficient for compounds **26** and **17** were established as 40,000 M<sup>-1</sup> cm<sup>-1</sup> at  $\lambda_{\text{max}}$  = 302nm.]

(26): MALDI-TOF  $[M + H]^+$  calcd for  $C_{58}H_{79}N_{22}O_{11}^+$  = 1259.6, observed = 1260.1.

(17): MALDI-TOF  $[M + H]^+$  calcd for  $C_{61}H_{75}N_{22}O_{12}^+$  = 1307.6, observed = 1307.8.

### Scheme S1. Synthesis of hairpin polyamide 17

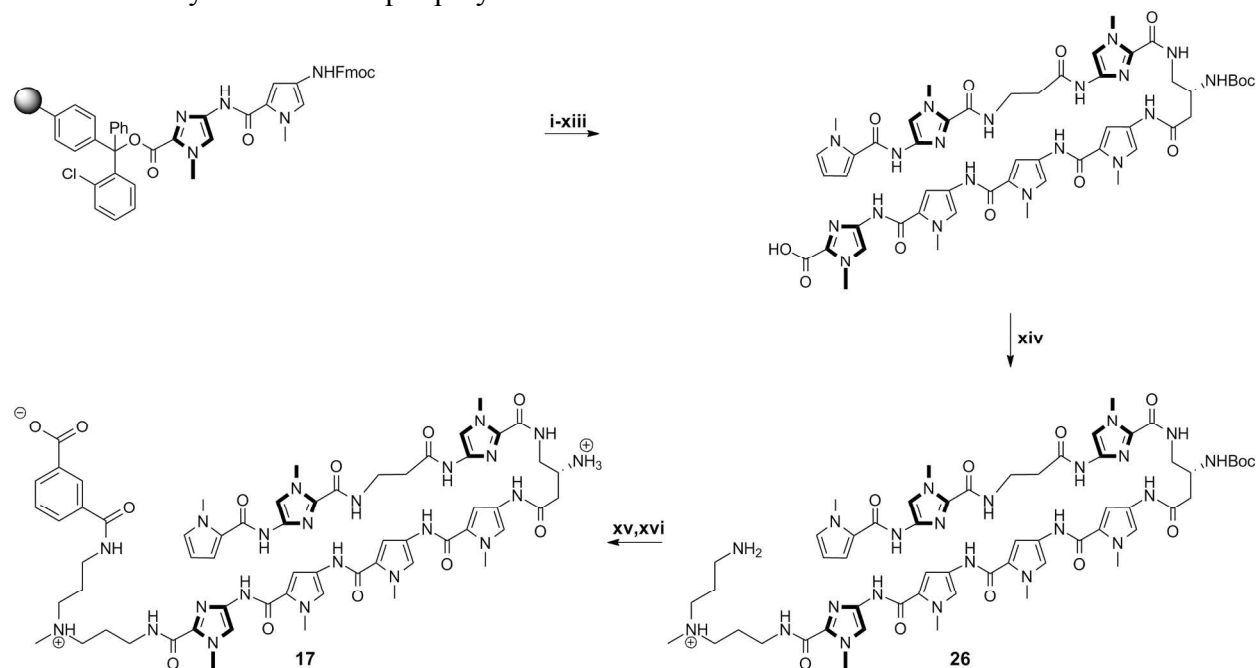

<sup>1</sup>All PyBOP-mediated coupling conditions were performed under microwave-assisted conditions (see Table 1).

<sup>2</sup>Reagents and conditions: (i) 50% piperidine, DMF; (ii) FmocPyOH, PyBOP, DIEA, DMF; (iii) 50% piperidine, DMF; (iv) FmocPyOH, PyBOP, DIEA, DMF; (v) 50% piperidine, DMF; (vi) Boc- $\beta$ -Dab(Fmoc)-OH, PyBOP, DIEA, DMF; (vii) 50% piperidine, DMF; (viii) FmocImOH, PyBOP, DIEA, DMF; (ix) 50% piperidine, DMF; (x) Fmoc- $\beta$ -Ala-OH, PyBOP, DIEA, DMF; (xi) 50% piperidine, DMF; (xii) PyImOH, PyBOP, DIEA, DMF; (xiii) 30% HFIP, DCM; (xiv) 3,3'-diamino-N-methyldipropylamine, PyBOP, DMF; (xv) Isophthalic acid, PyBOP, DIEA, DMF; (xvi) TFA.

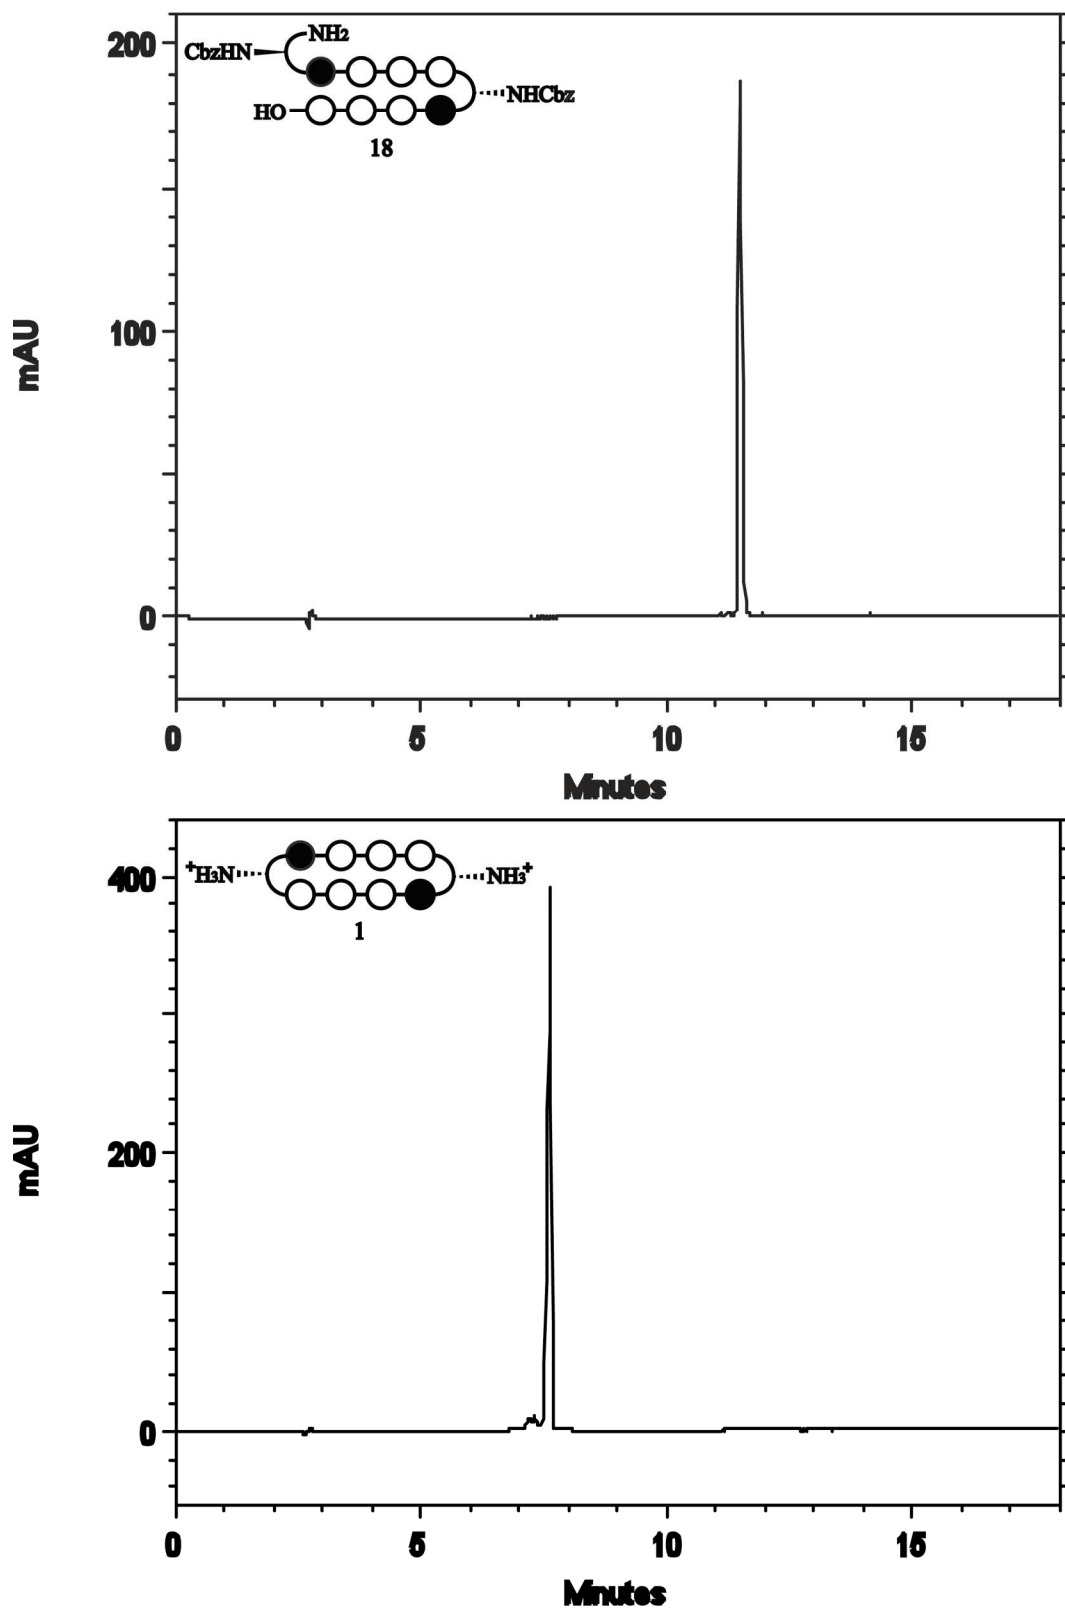

Figure S1. HPLC Spectrum of 18 and 1.

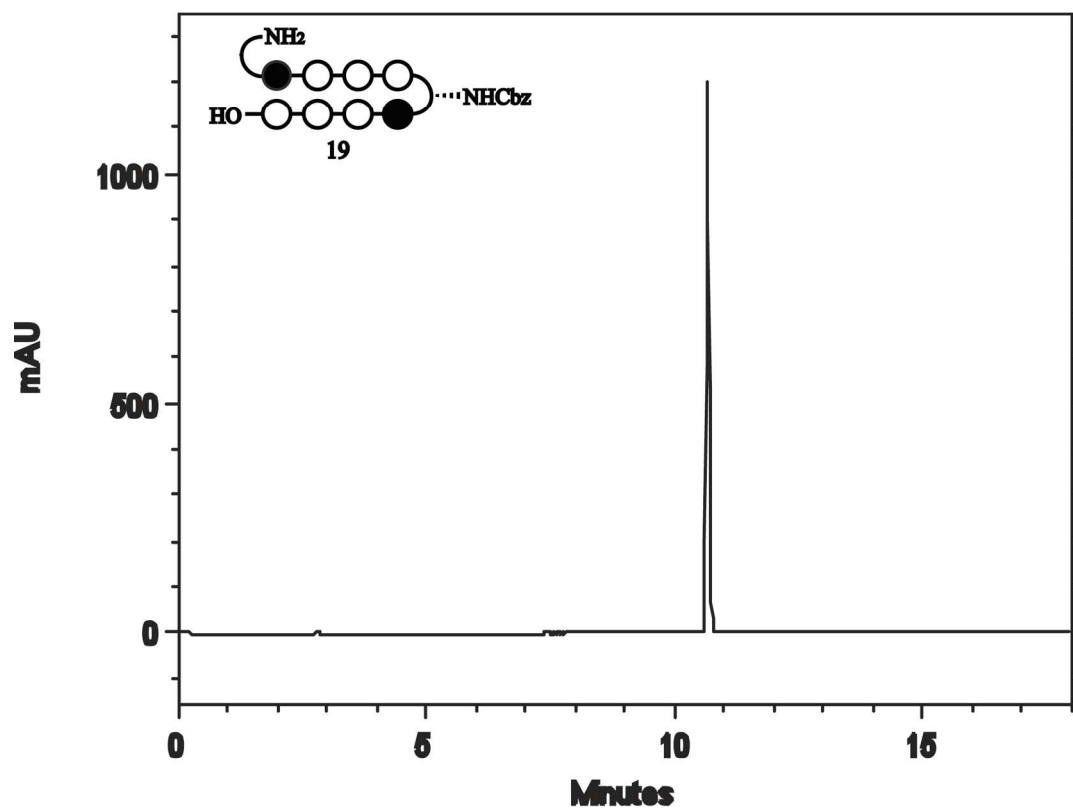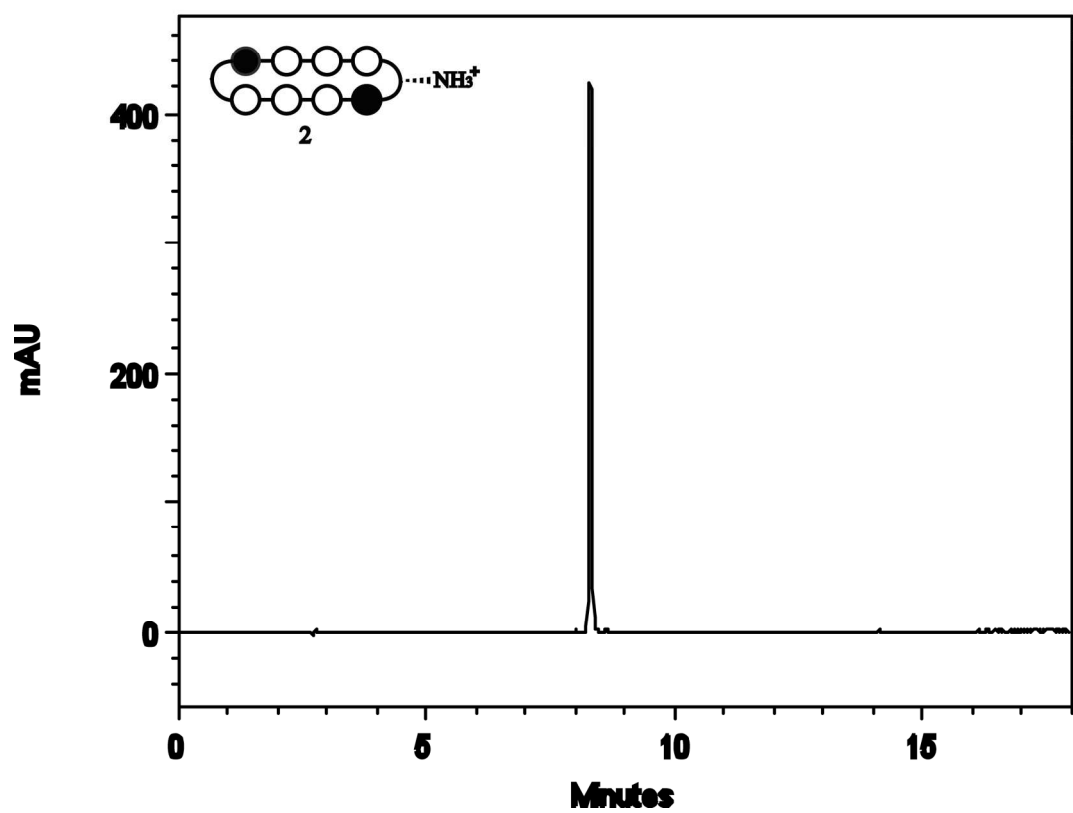

Figure S2. HPLC Spectrum of 19 and 2.

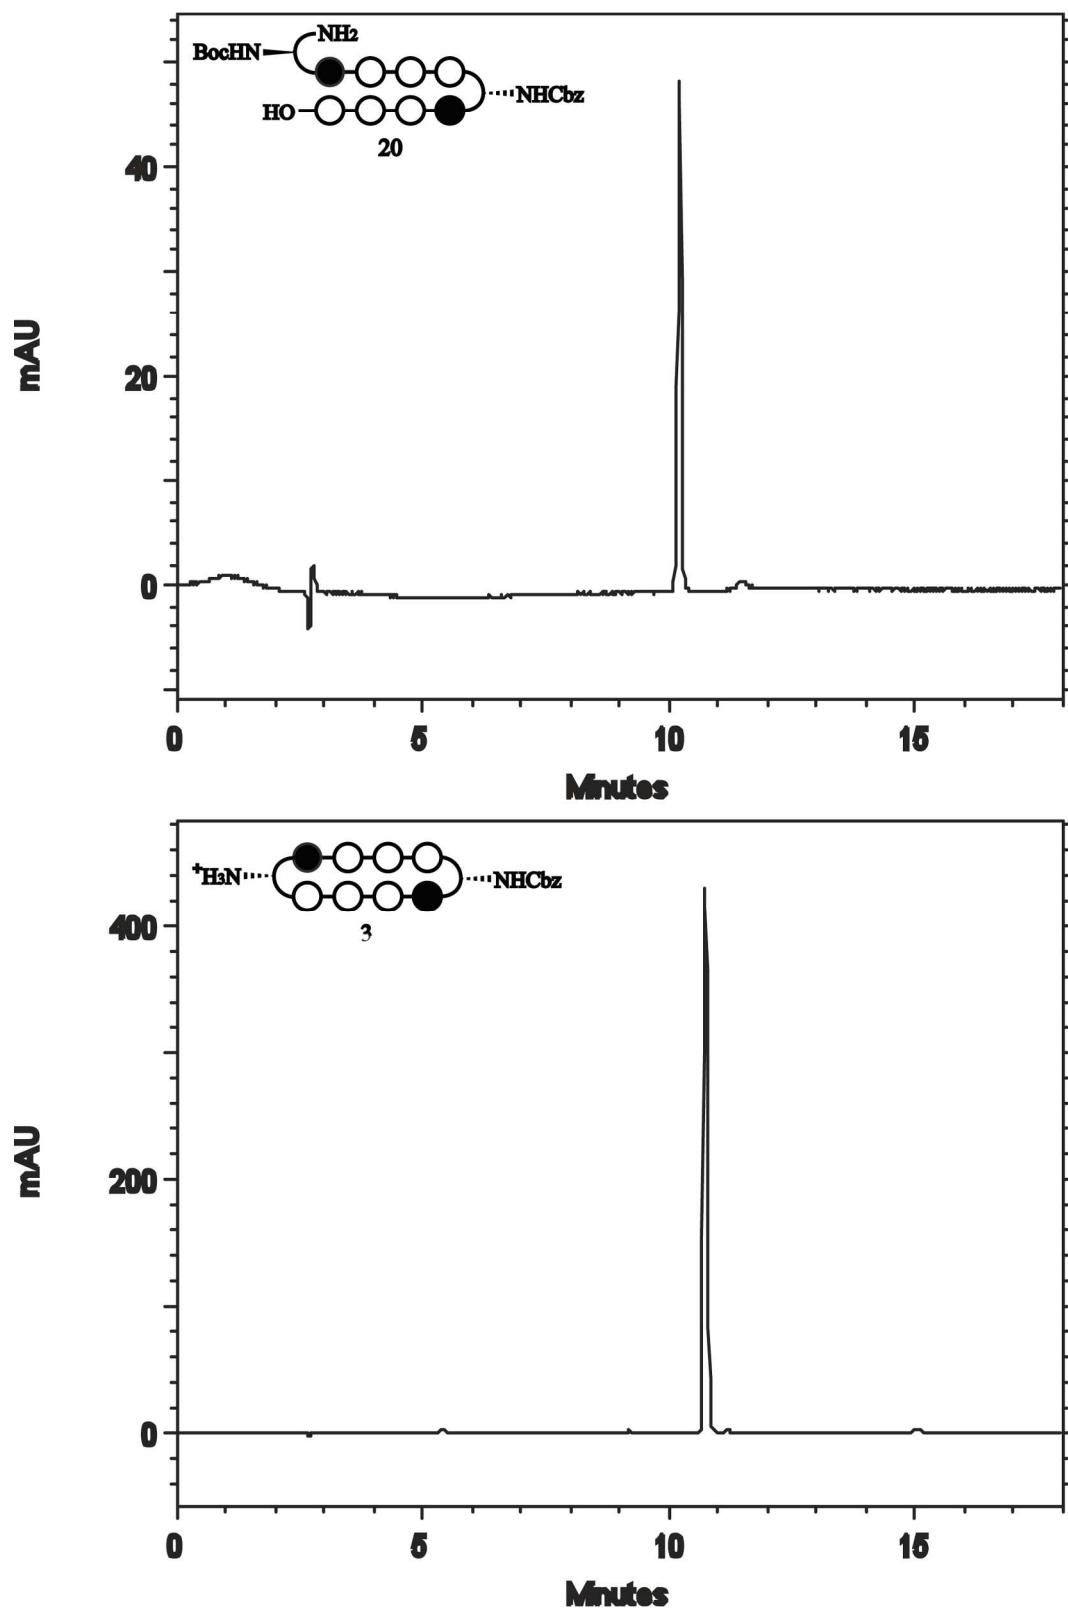

Figure S3. HPLC Spectrum of 20 and 3.

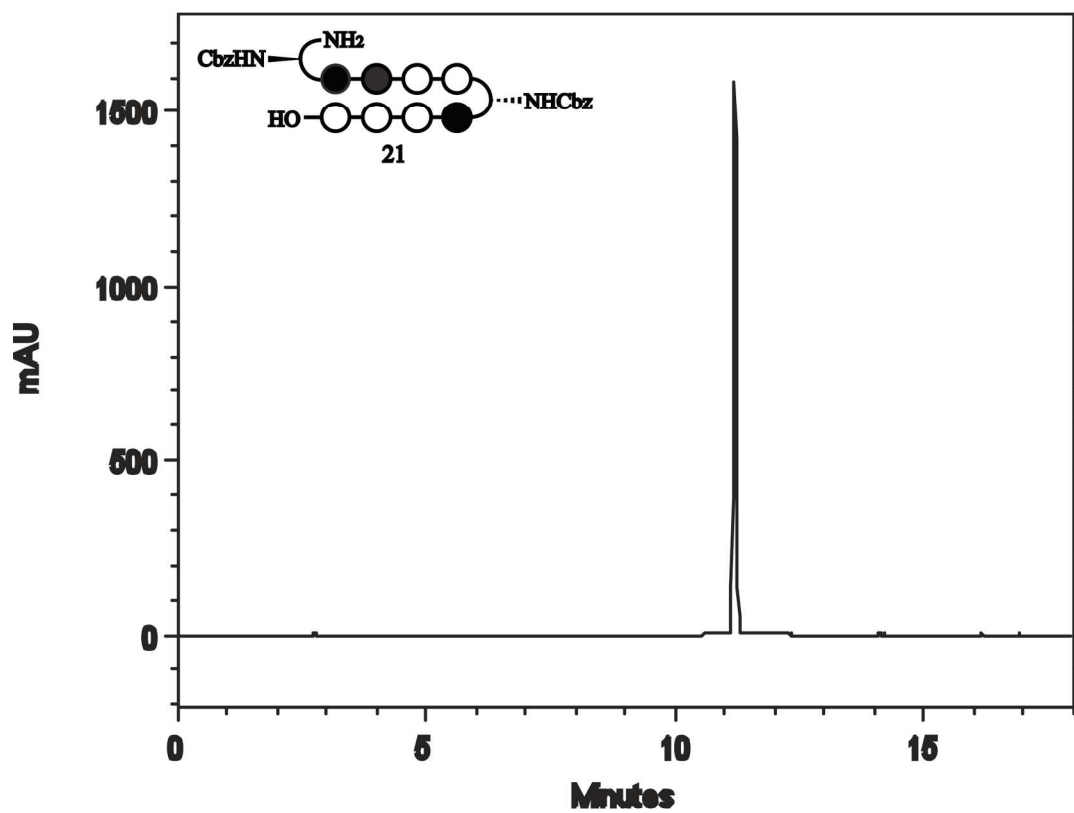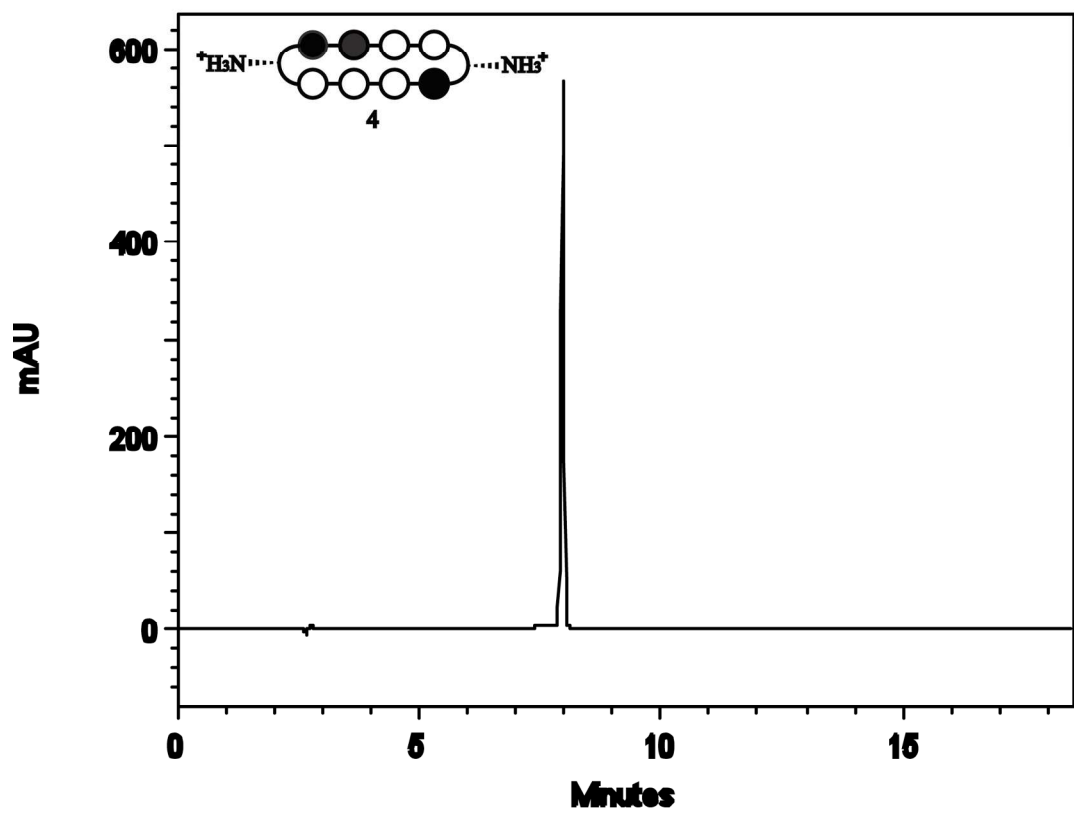

Figure S4. HPLC Spectrum of 21 and 4.

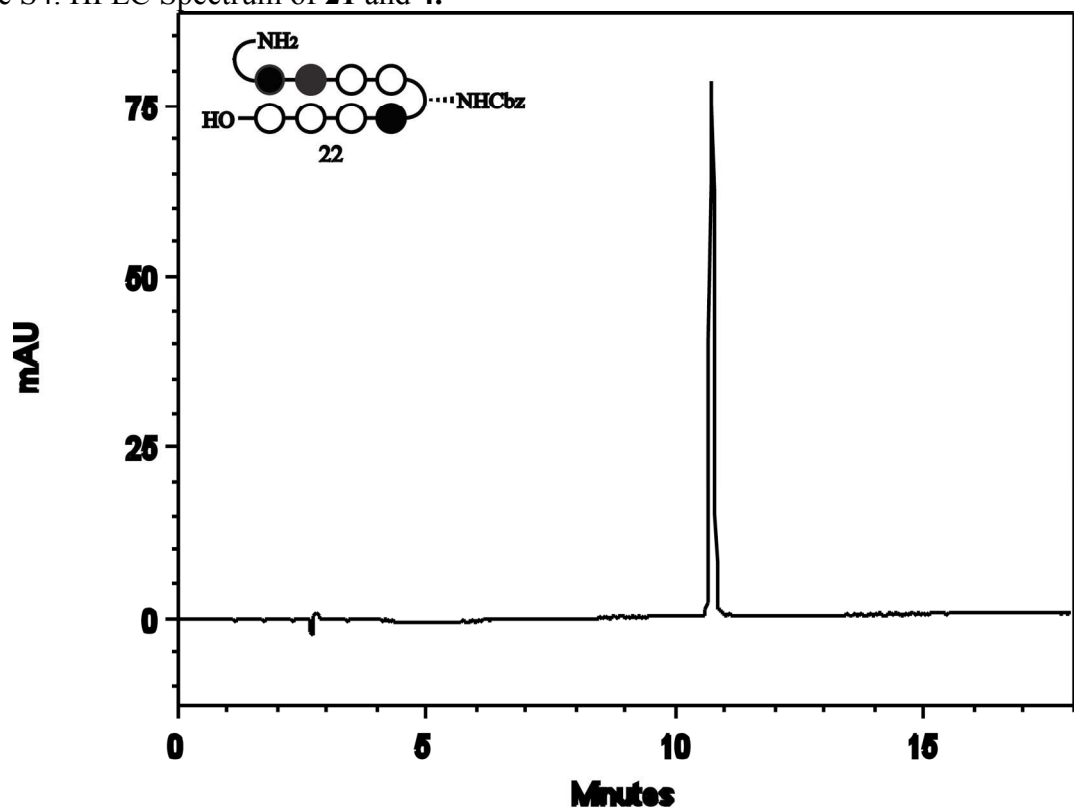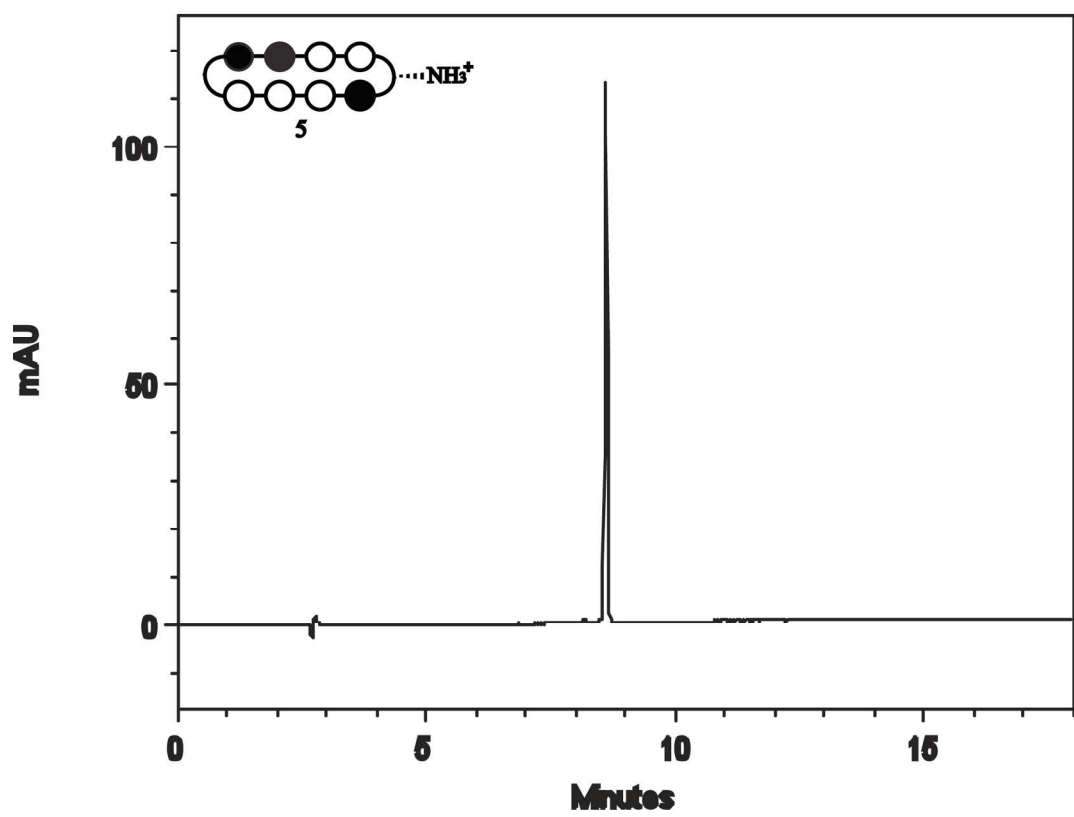



Figure S5. HPLC Spectrum of 22 and 5.

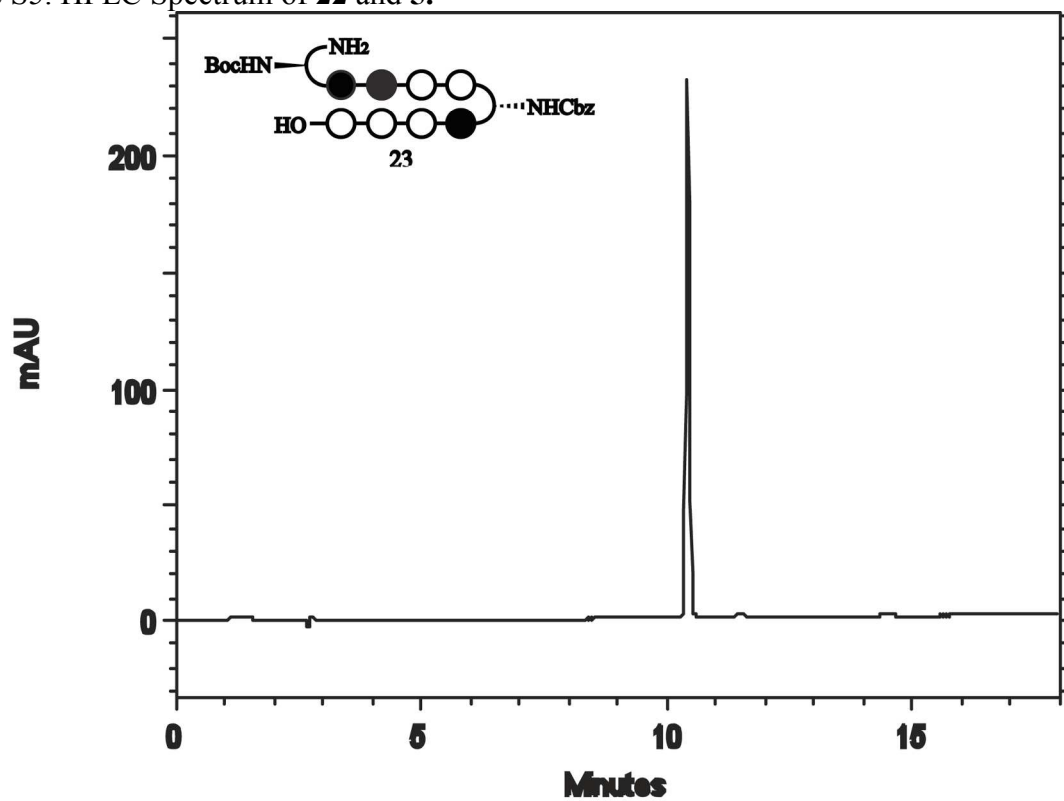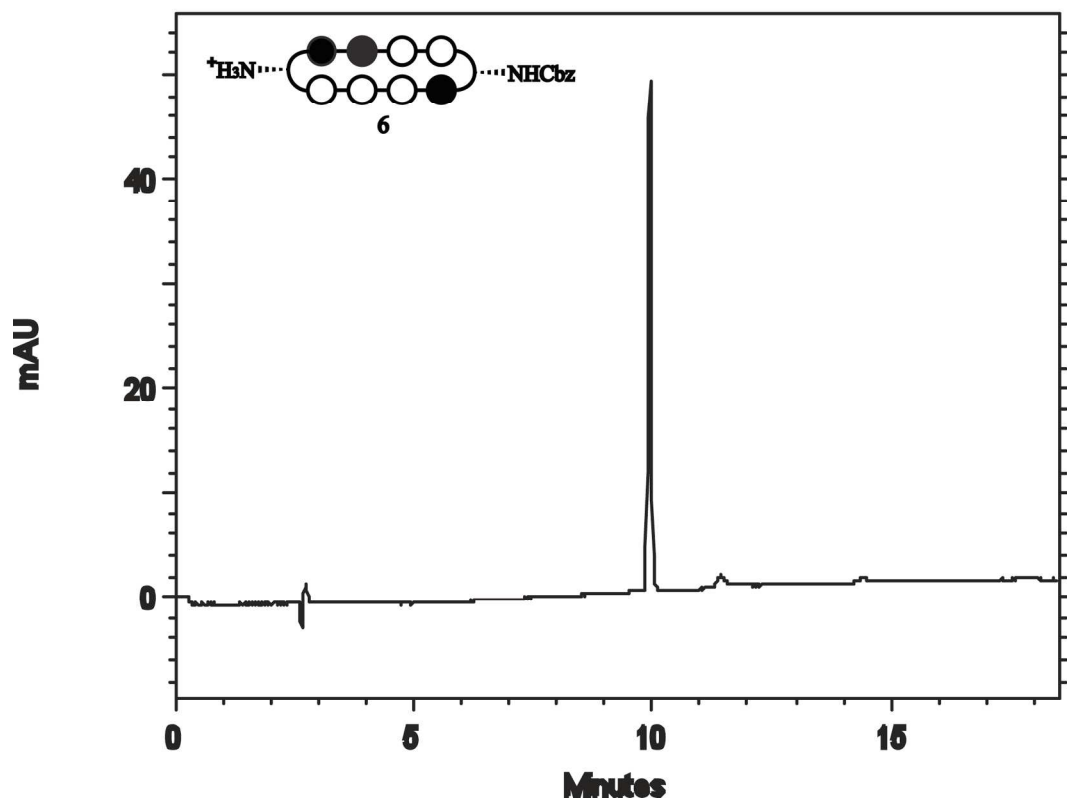

Figure S6. HPLC Spectrum of 23 and 6.

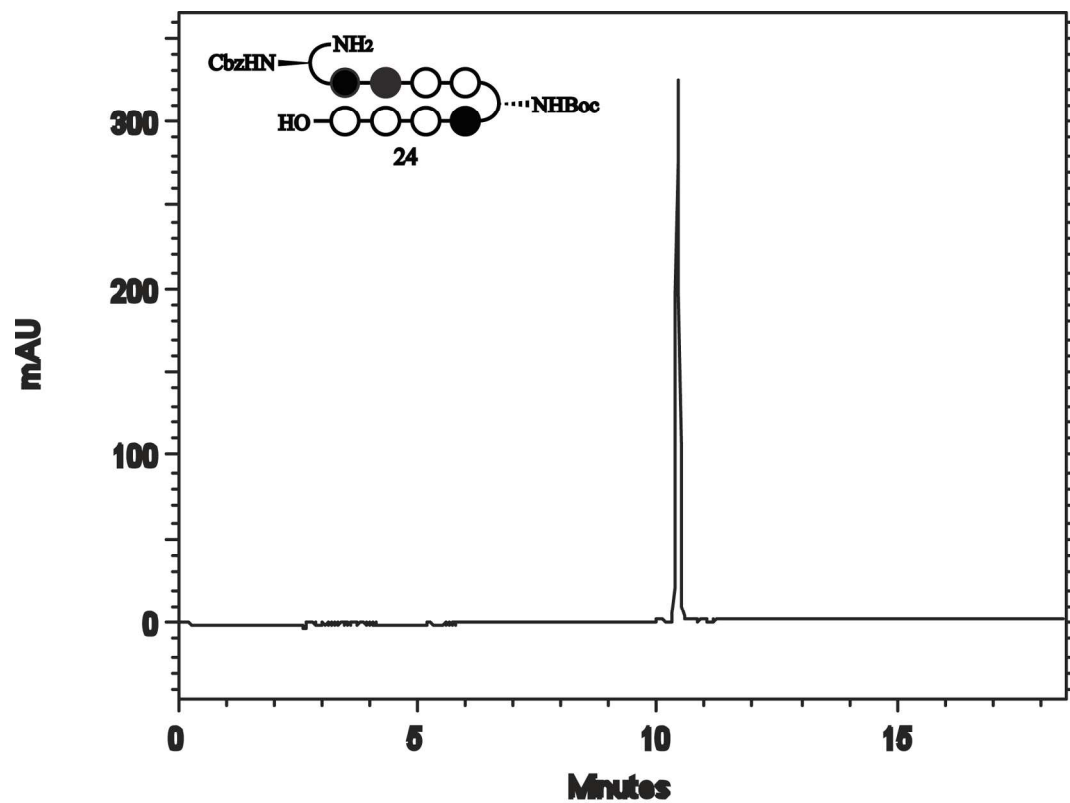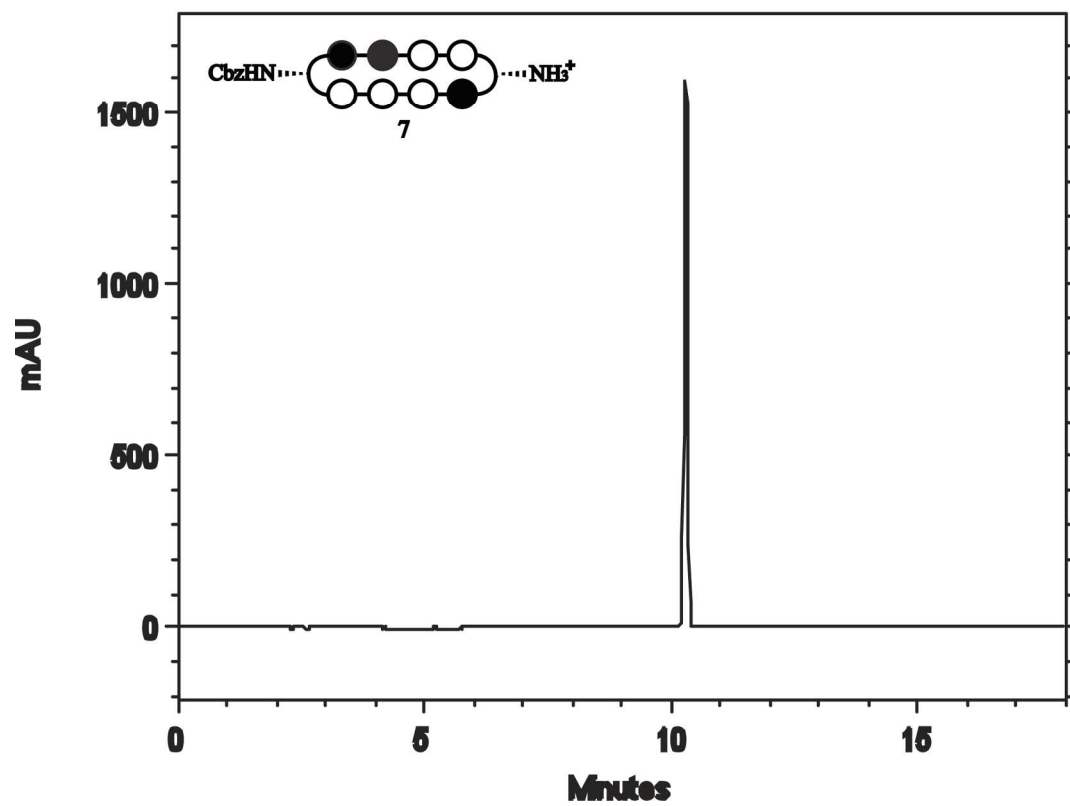

Figure S7. HPLC Spectrum of 24 and 7.

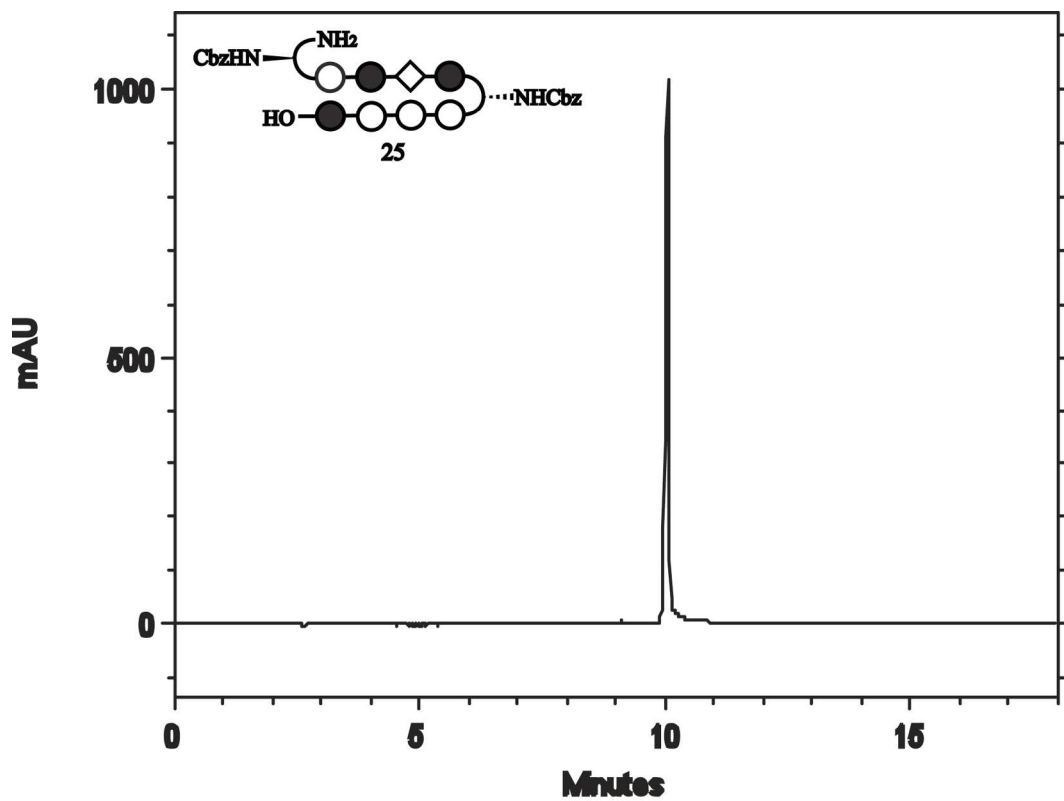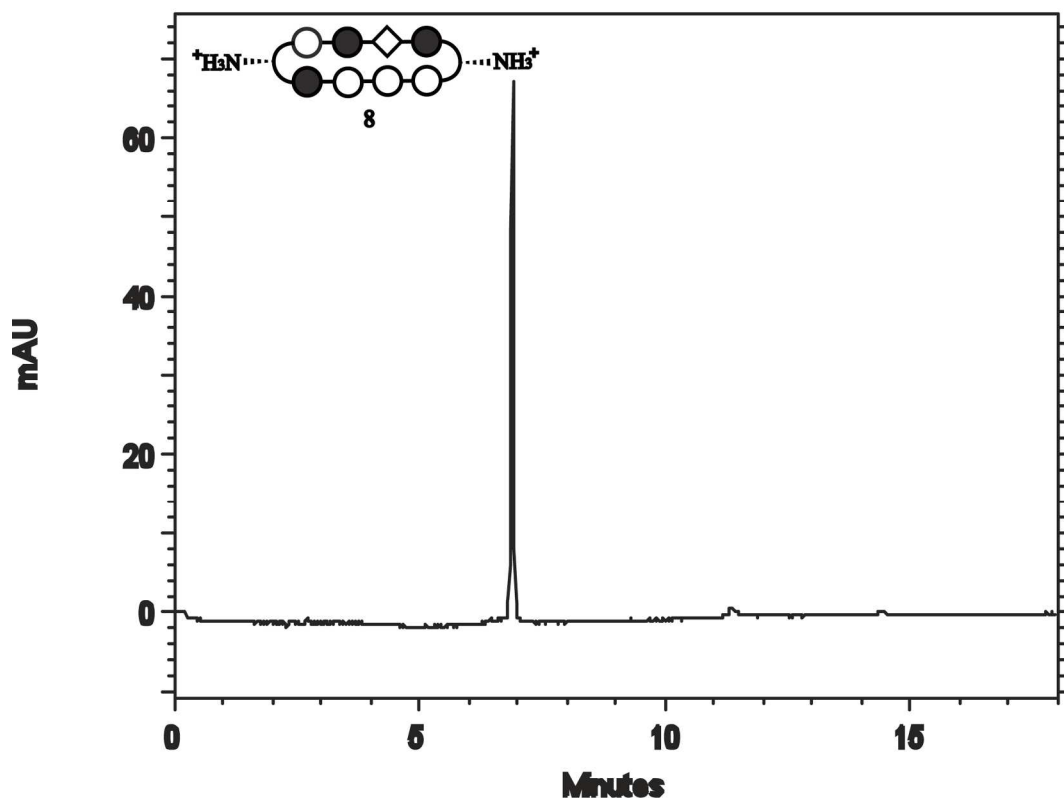

Figure S8. HPLC Spectrum of 25 and 8.

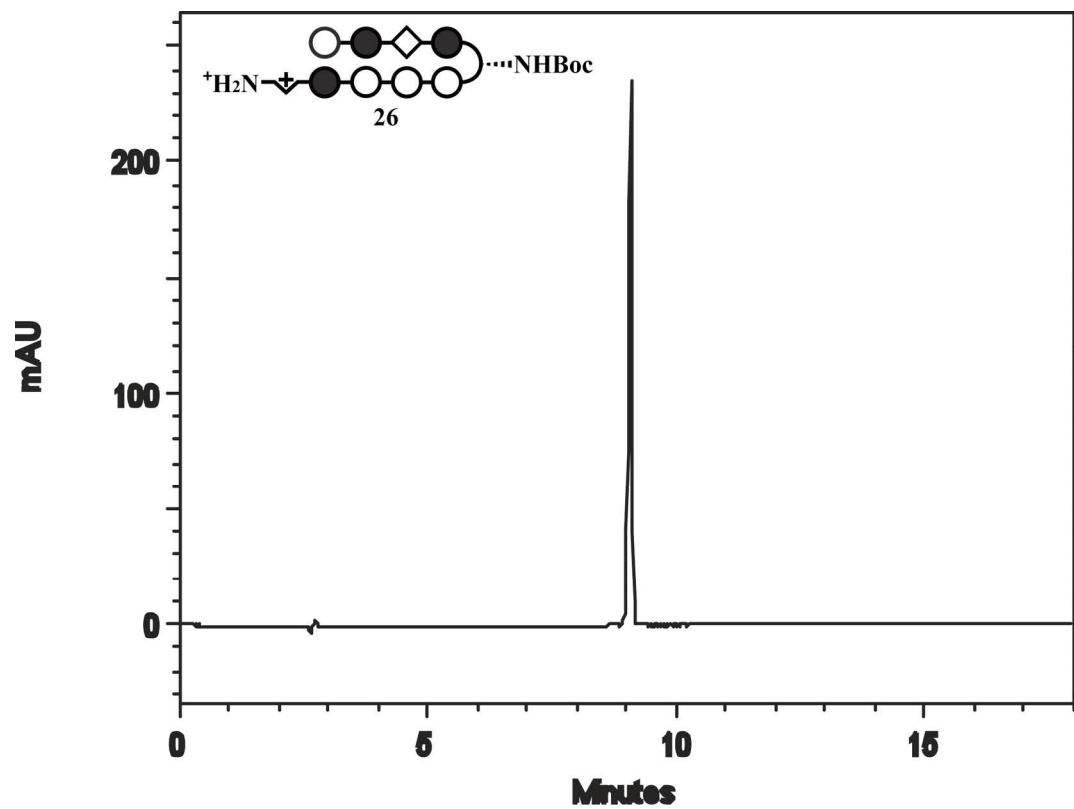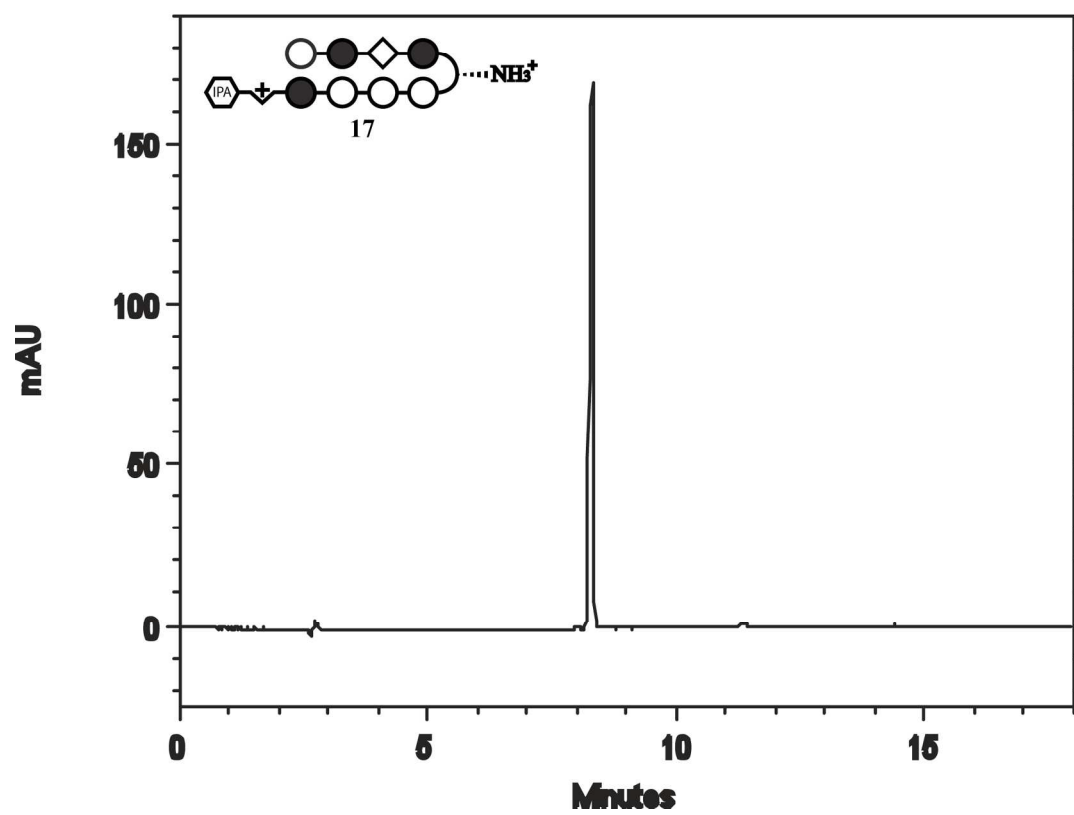

Figure S9. HPLC Spectrum of 26 and 17.

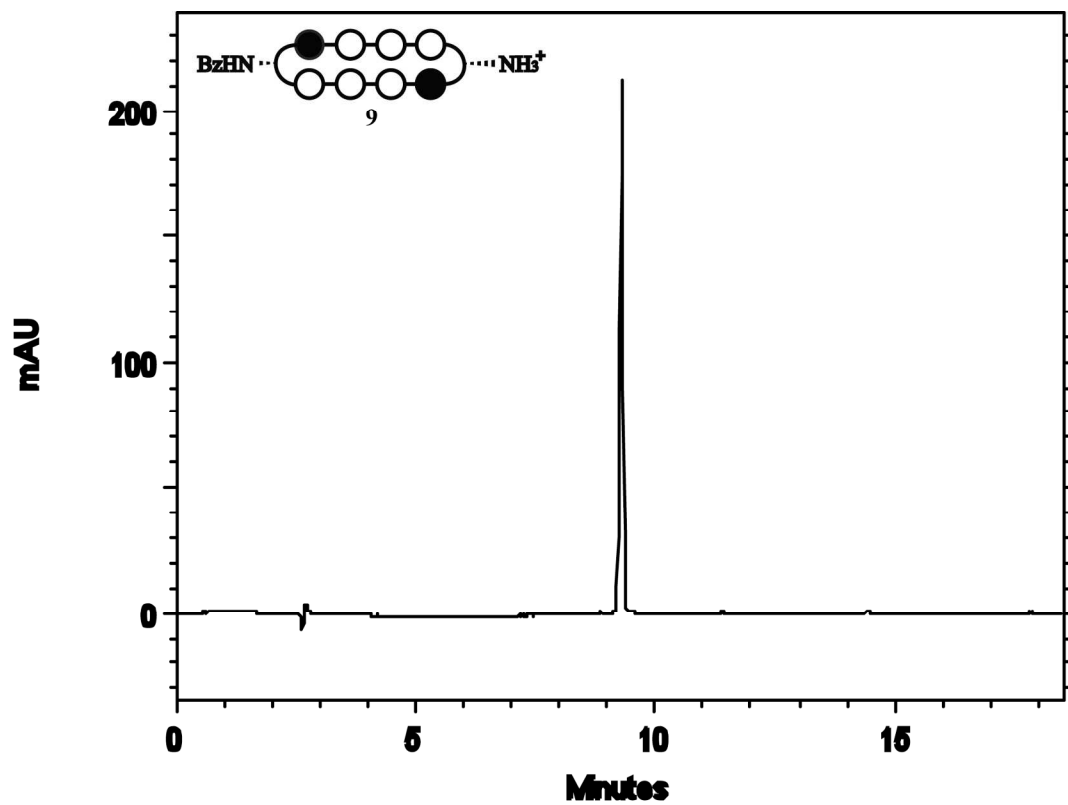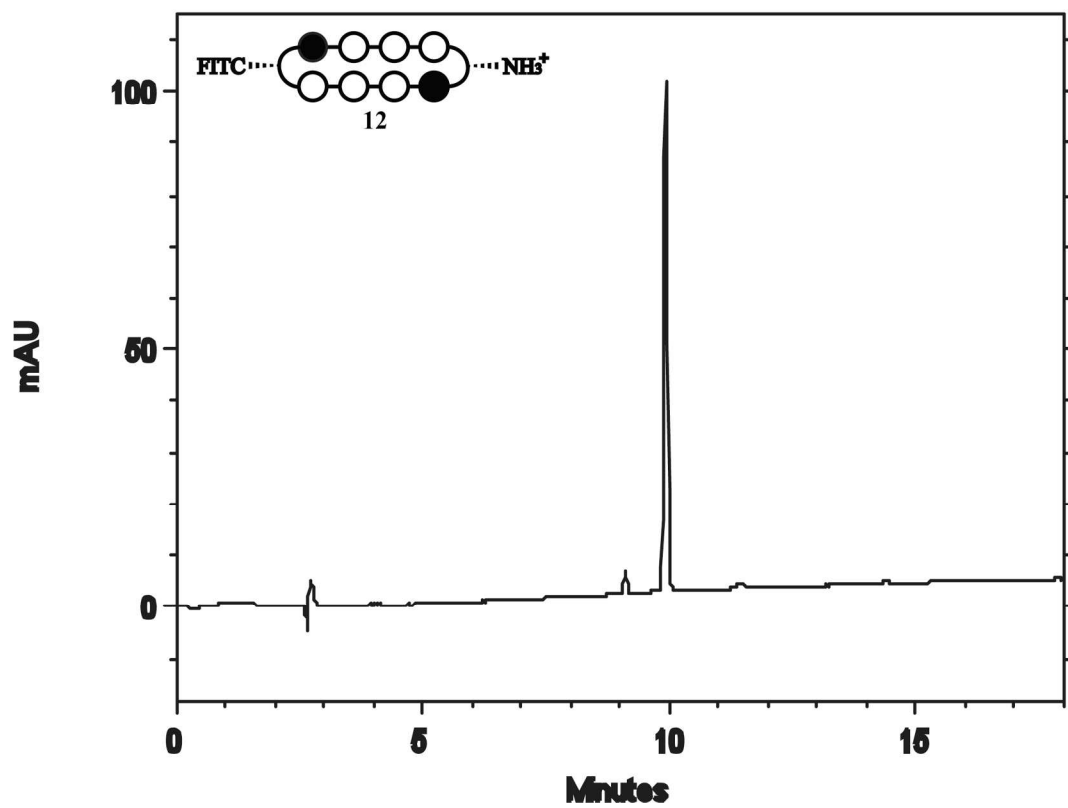

Figure S10. HPLC Spectrum of 9 and 12.

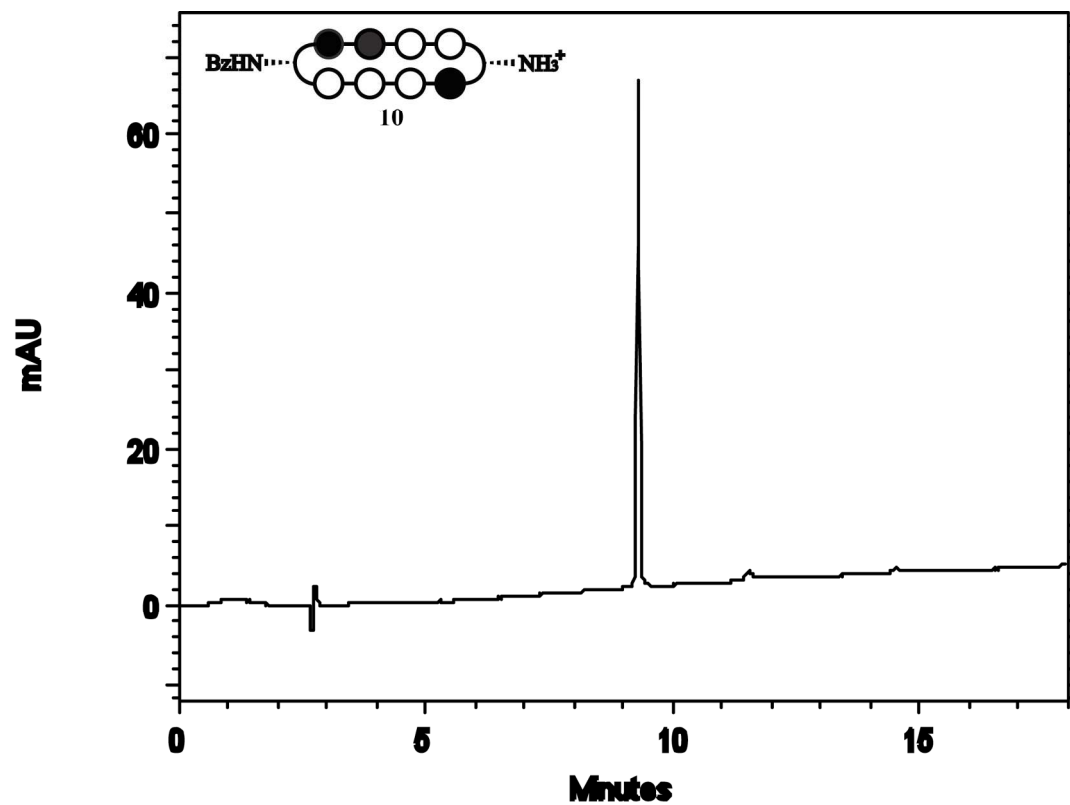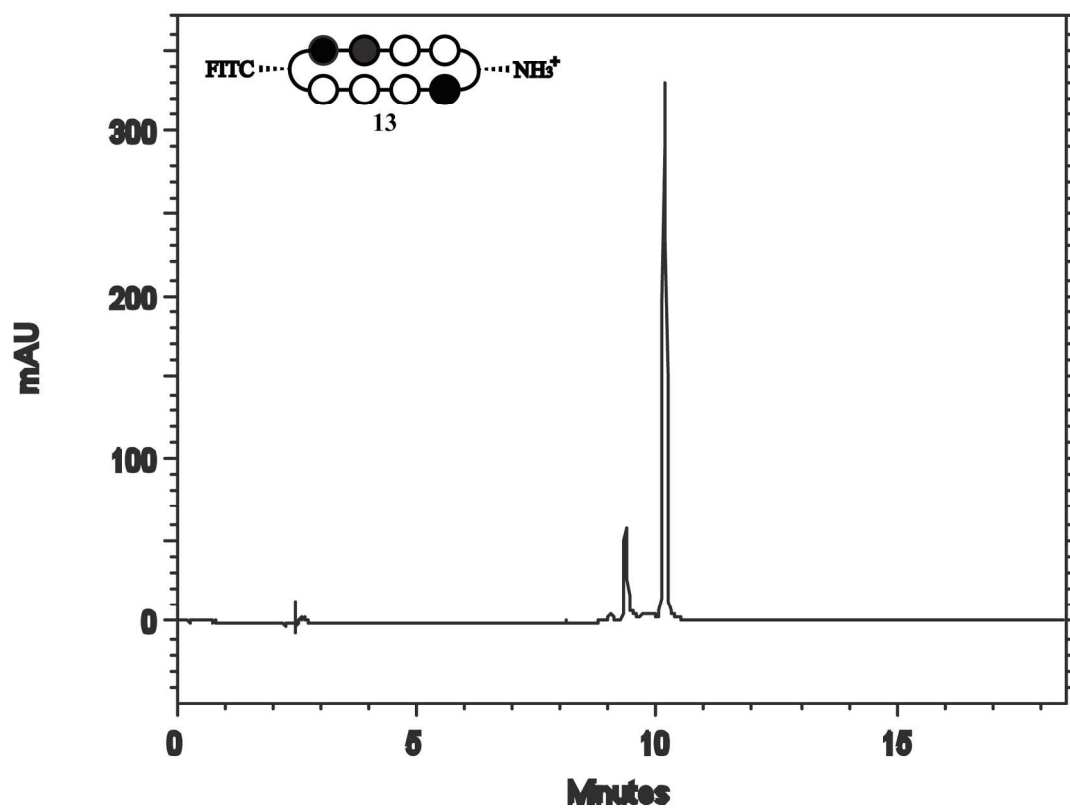

Figure S11. HPLC Spectrum of 10 and 13.

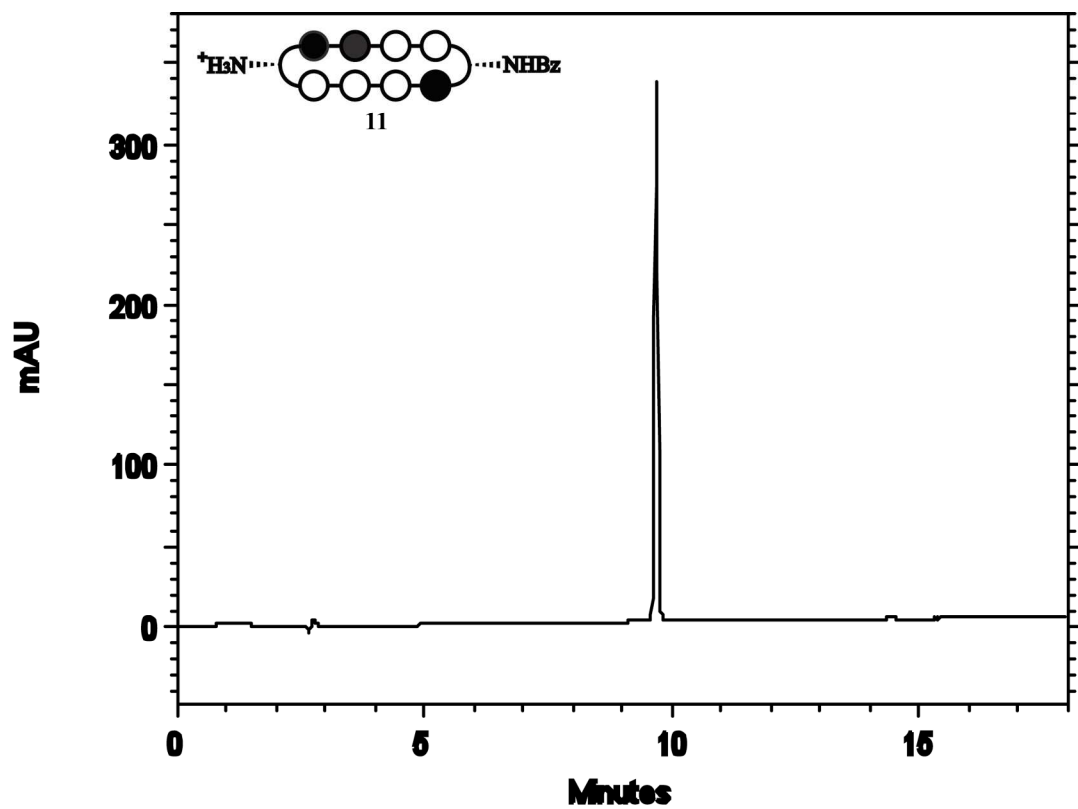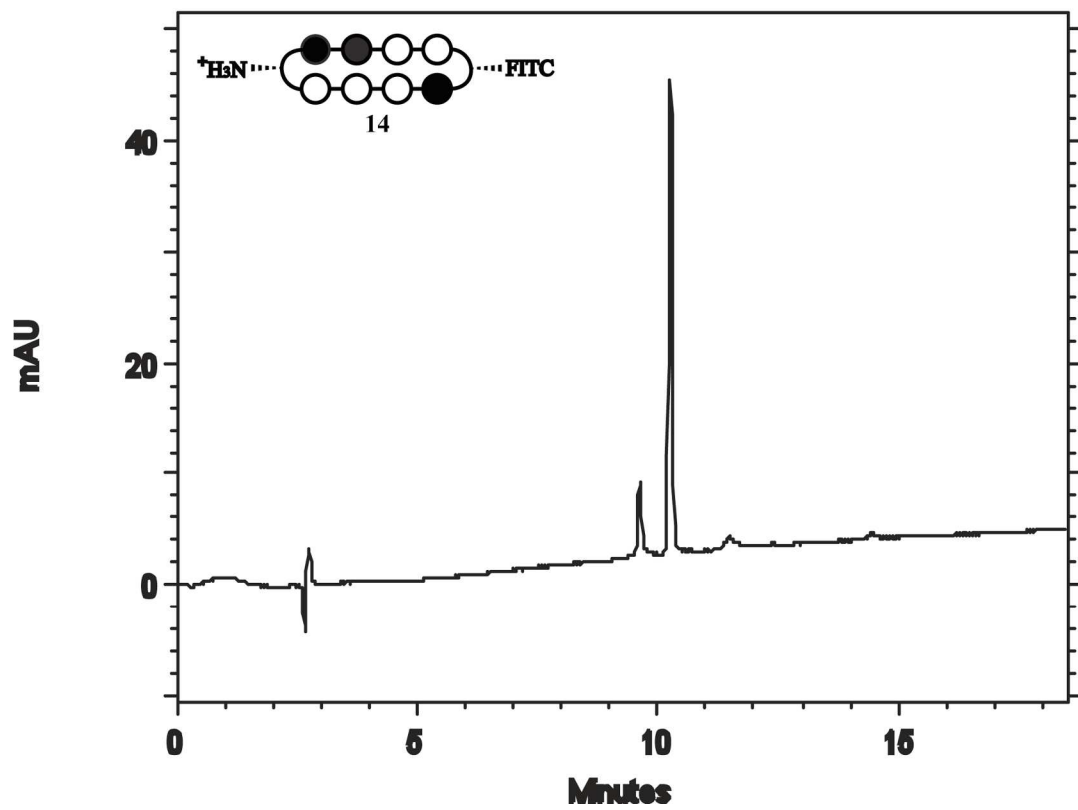

Figure S12. HPLC Spectrum of 11 and 14.

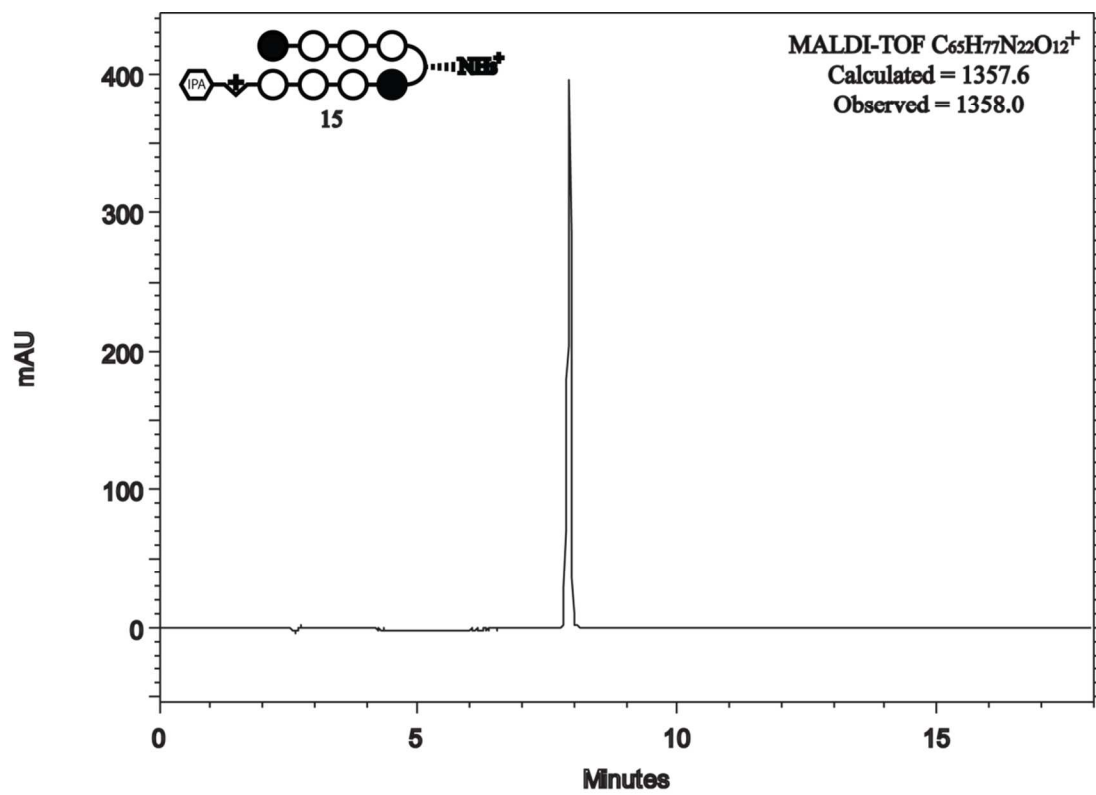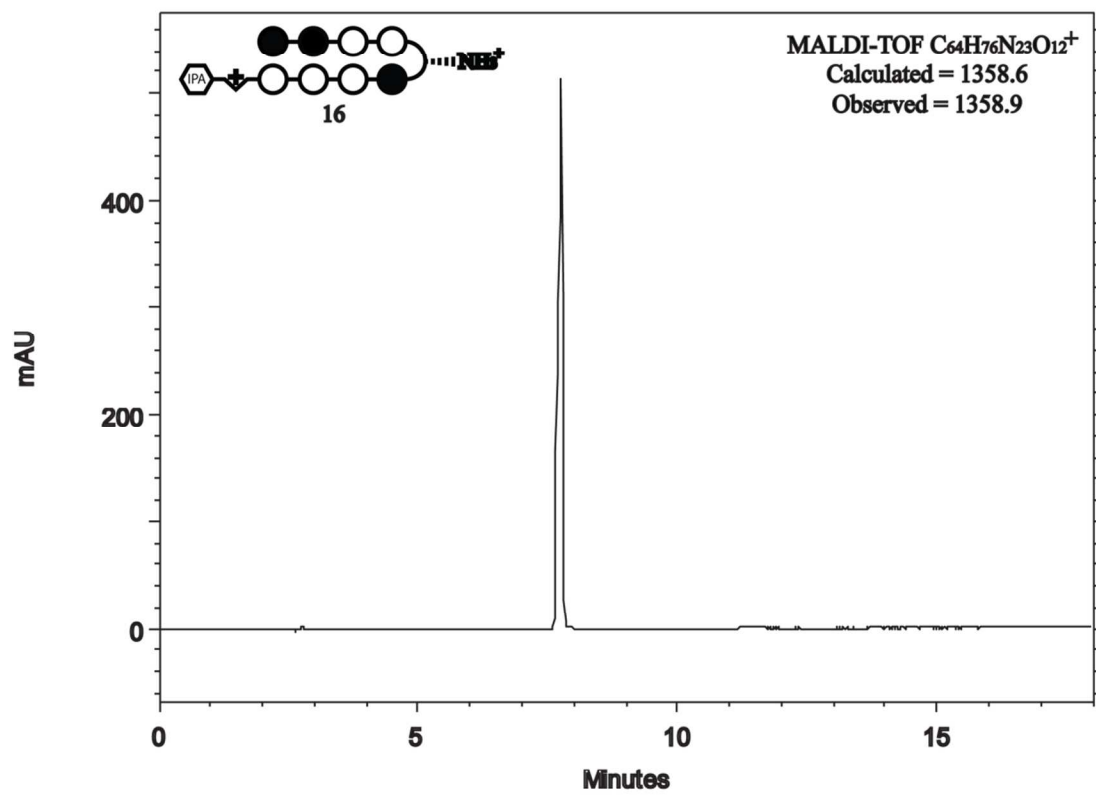

Figure S13. HPLC Spectrum of **15** and **16**.



A

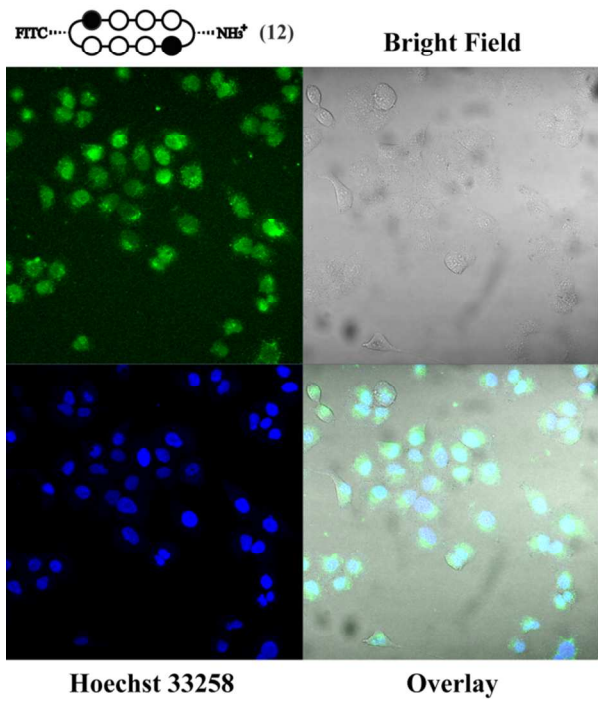

B

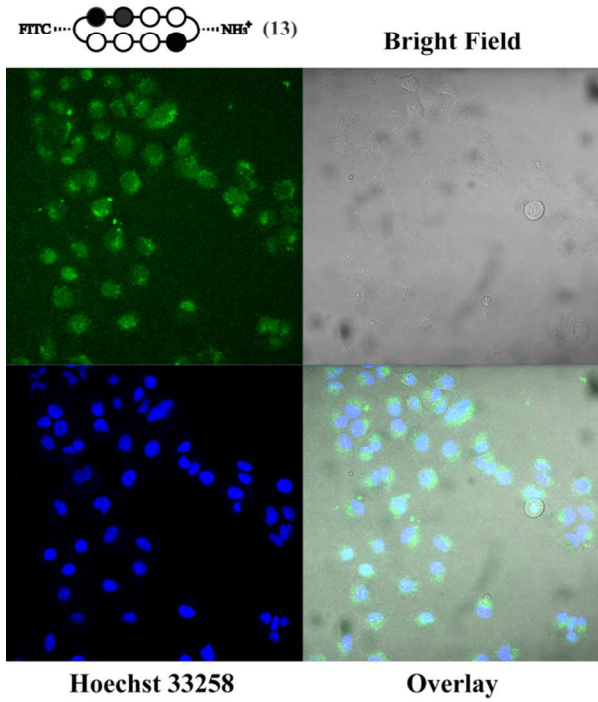

C

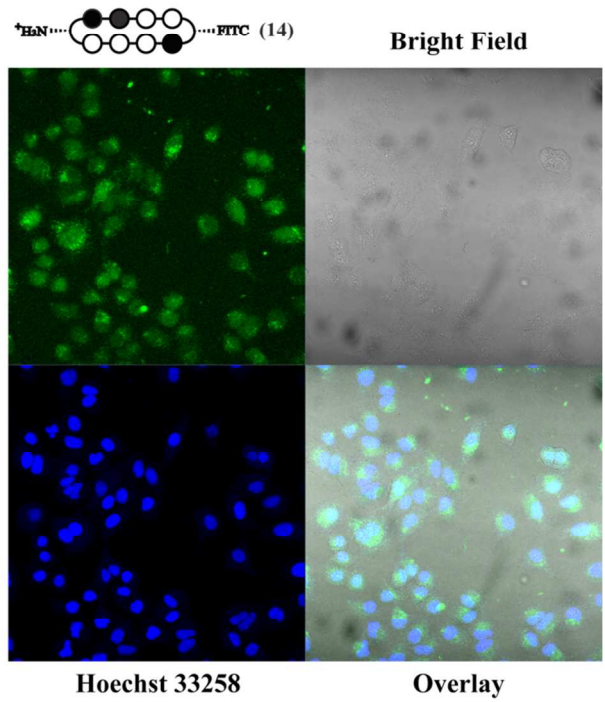

Figure S14. Confocal microscopy analysis of 12-14 in A549 cells.

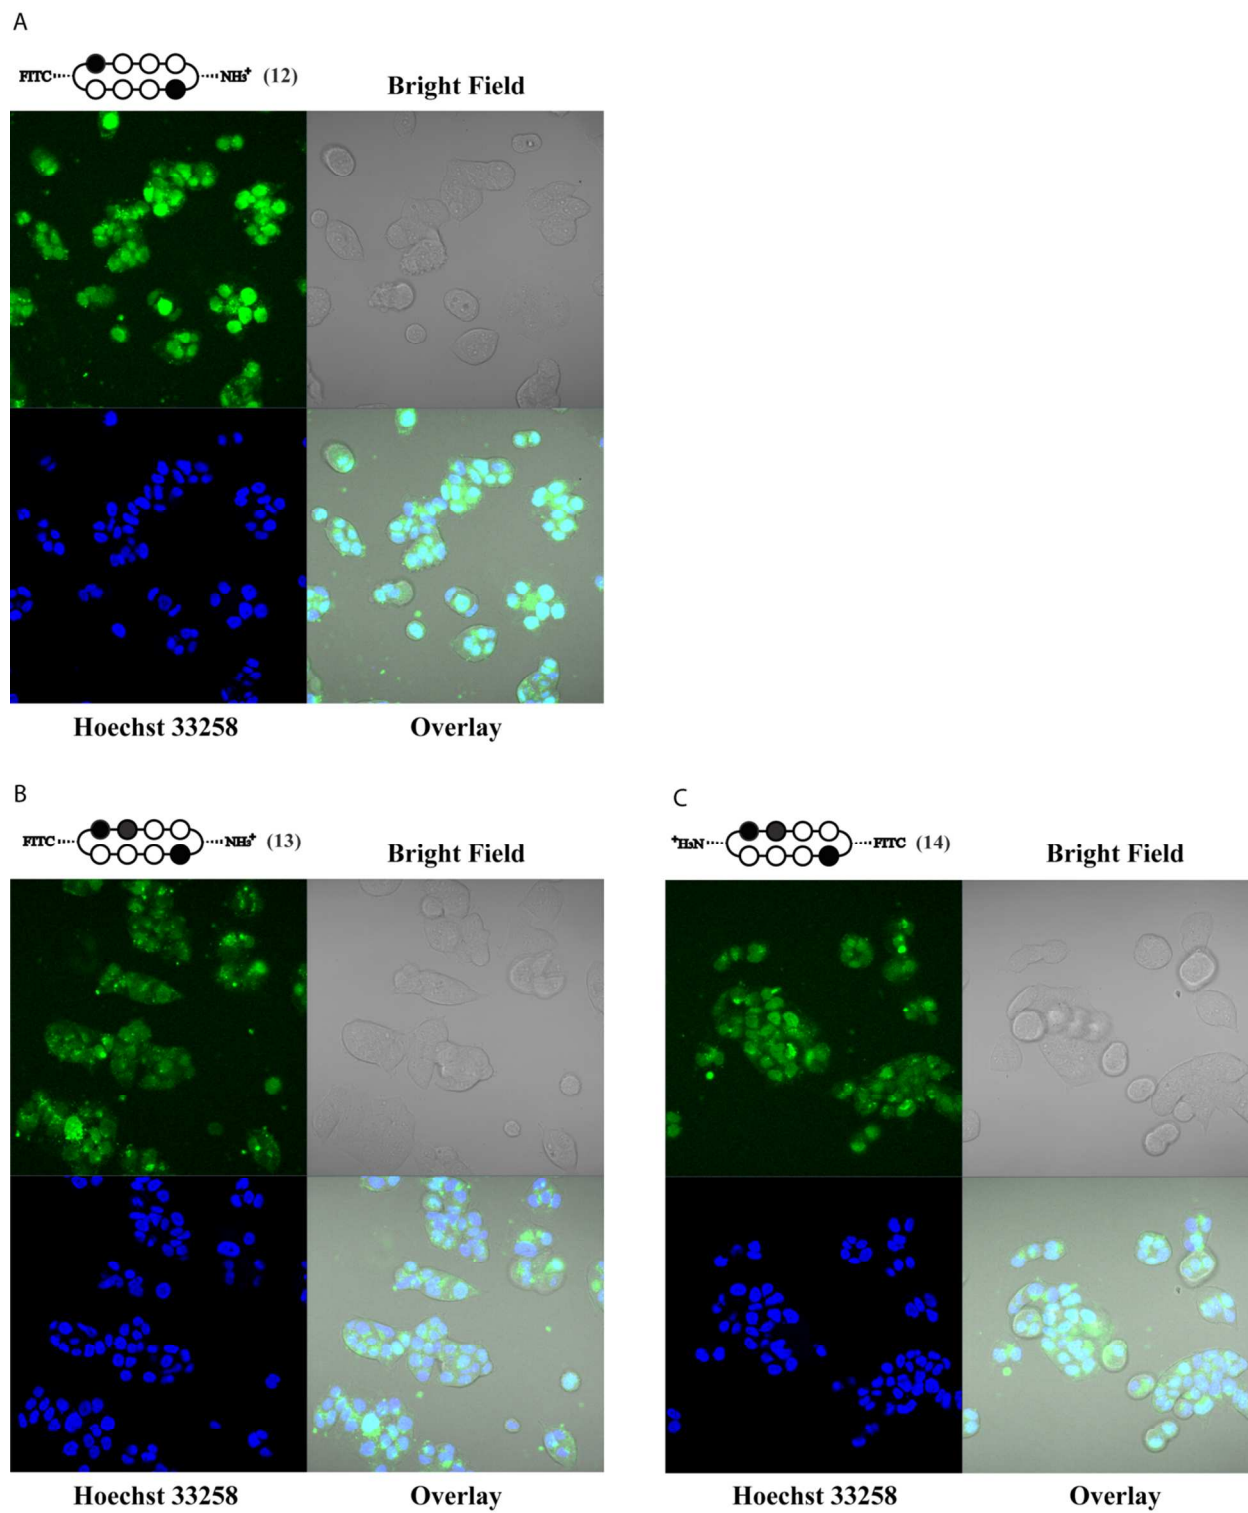

Figure S15. Confocal microscopy analysis of **12-14** in T47D cells.

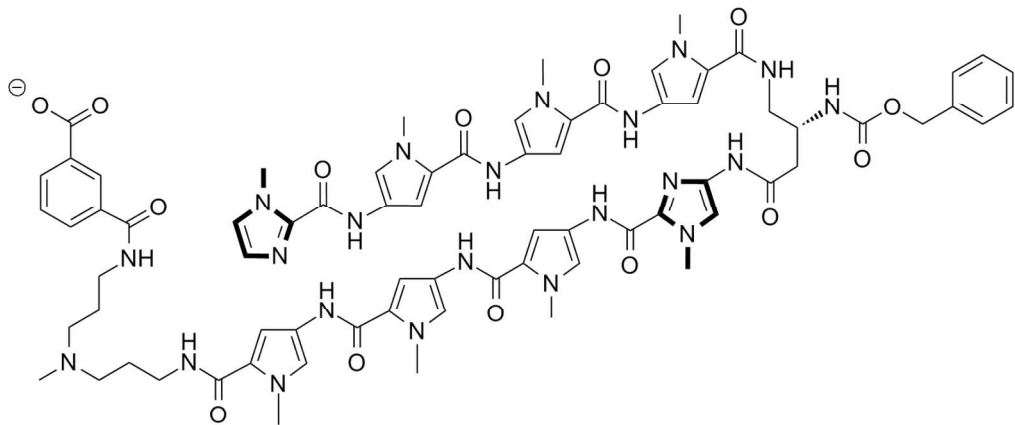

**S1**

Figure S16. In previous unpublished results, the cytotoxicity of compound **S1** in A549 cells was examined using the same Sulforhodamine B assay described in the text. The  $IC_{50}$  was determined to be  $0.003\mu M \pm 0.002\mu M$ .

**A**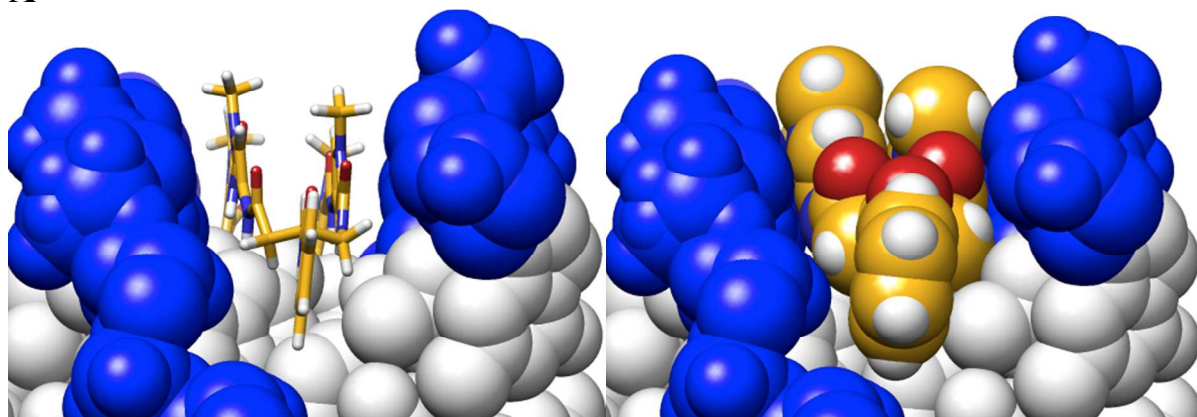**B**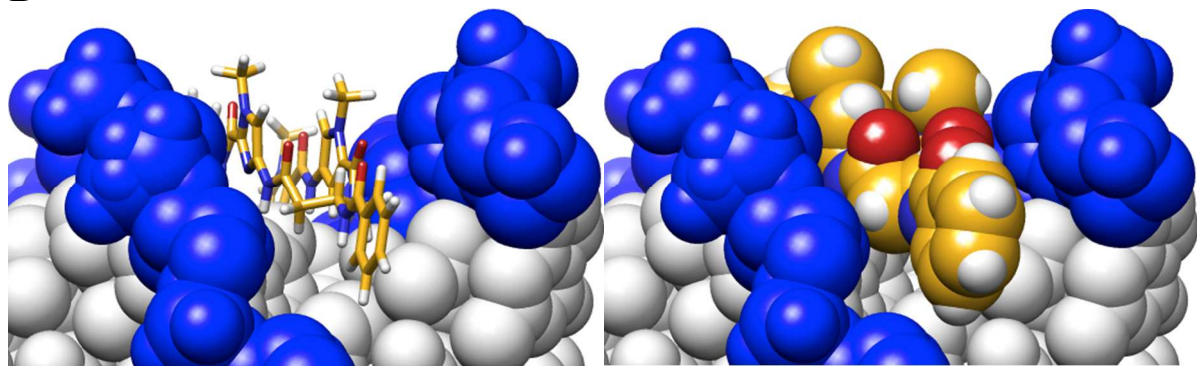**C**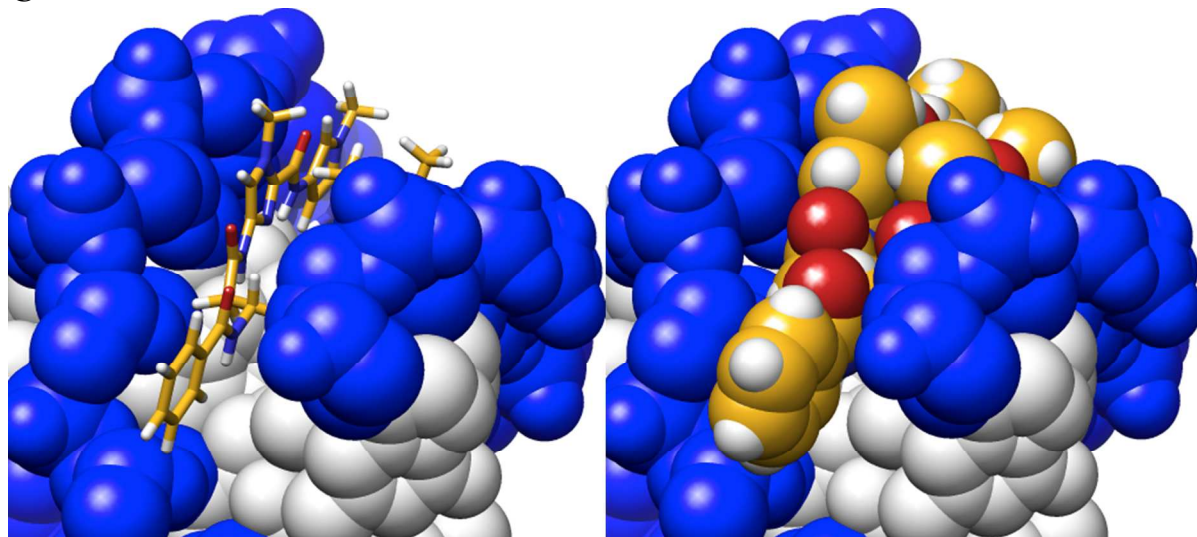

Figure S17. (Left) Stick model and (right) space-filling model of benzoyl substituted turn along the DNA minor groove from three different views. Based on published crystal structure by Chenoweth et al (PDB ID: 3OMJ).
